# Supplementary material
Source: HighWire-hosted journal article supplement (https://www.jpn.ca/highwire/filestream/89711/field_highwire_adjunct_files/0/jpn-140119-1-at.pdf)
Supplement: jpn-140119-1-at.pdf [file jpn-140119-1-at.pdf]

**Appendix 1** to Chen Z, Du M, Zhao Y, et al. Voxel-wise meta-analyses of brain blood flow and local synchrony abnormalities in medication-free patients with major depressive disorder.  
*J Psychiatry Neurosci* 2015.

DOI: 10.1503/jpn.140119

Copyright © 2015 The Author(s) or their employer(s). To receive this resource in an accessible format, please contact us at [cmajgroup@cmaj.ca](mailto:cmajgroup@cmaj.ca).

**Table S1: Quality assessment checklist (score 0/0.5/1 per item; total score out of 10)\***

Category 1: Participants

1. Patients were evaluated prospectively, specific diagnostic criteria were applied, and demographic data were reported.
2. Healthy comparison participants were evaluated prospectively, psychiatric and medical illnesses were excluded.
3. Important variables (e.g., age, sex, illness duration, onset, medication status, comorbidity, severity of illness) were checked either by stratification or statistically.
4. Sample size per group > 10.

Category 2: Methods for image acquisition and analysis

5. Whole brain analysis was automated with no a priori regional selection.
6. Coordinates reported in a standard space.
7. The imaging technique used was clearly described so that it could be reproduced.
8. Measurements were clearly described so that they could be reproduced.

Category 3: Results and conclusions

9. Statistical parameters for significant and important nonsignificant differences were provided.
10. Conclusions were consistent with the results obtained and the limitations were discussed.

\*When criteria were partially met, 0.5 points were awarded.

**Table S2: Regional differences between medication-free patients with MDD and controls in the subgroup meta-analyses of rCBF studies using ES-SDM (part 1 of 2)**

| Region                                   | Talairach coordinates |    |    | SDM z score | p value | No. voxels | Cluster breakdown (no. voxels)                                                                                                                                                                                                                                                                                                                                                                 |
|------------------------------------------|-----------------------|----|----|-------------|---------|------------|------------------------------------------------------------------------------------------------------------------------------------------------------------------------------------------------------------------------------------------------------------------------------------------------------------------------------------------------------------------------------------------------|
|                                          | x                     | y  | z  |             |         |            |                                                                                                                                                                                                                                                                                                                                                                                                |
| <b>rCBF studies excluding ASL</b>        |                       |    |    |             |         |            |                                                                                                                                                                                                                                                                                                                                                                                                |
| MDD > control                            |                       |    |    |             |         |            |                                                                                                                                                                                                                                                                                                                                                                                                |
| Right thalamus, ventral anterior nucleus | 12                    | −6 | 10 | 2.055       | < 0.001 | 626        | R thalamus, ventral anterior nucleus (113)<br>R thalamus, anterior nucleus (54)<br>R thalamus, ventral lateral nucleus (35)<br>L thalamus, pulvinar (197)<br>L thalamus, lateral posterior nucleus (96)<br>L thalamus, medial dorsal nucleus (38)<br>R lentiform nucleus, putamen (66)<br>R lentiform nucleus, lateral globus pallidus (20)<br>R lentiform nucleus, medial globus pallidus (7) |
| R caudate                                | 6                     | 2  | 4  | 1.472       | < 0.001 | 214        | R caudate, caudate body (203)<br>R caudate, caudate head (11)                                                                                                                                                                                                                                                                                                                                  |
| MDD < control                            |                       |    |    |             |         |            |                                                                                                                                                                                                                                                                                                                                                                                                |
| R anterior cingulate                     | 6                     | 20 | −6 | −1.995      | < 0.001 | 216        | Bilateral anterior cingulate (99)<br>L subcallosal gyrus (50)<br>R caudate, caudate head (27)<br>Bilateral medial frontal gyrus (40)                                                                                                                                                                                                                                                           |
| R anterior cingulate                     | 4                     | 28 | 20 | −1.467      | 0.001   | 145        | Bilateral anterior cingulate (123)<br>Bilateral cingulate gyrus (22)                                                                                                                                                                                                                                                                                                                           |
| L insula                                 | −38                   | 16 | 8  | −1.865      | < 0.001 | 156        | L insula (156)                                                                                                                                                                                                                                                                                                                                                                                 |
| L superior temporal gyrus                | −48                   | 10 | −4 | −1.914      | < 0.001 | 89         | L superior temporal gyrus (89)                                                                                                                                                                                                                                                                                                                                                                 |
| L precentral gyrus                       | −50                   | 14 | 8  | −2.057      | <0.001  | 313        | L precentral gyrus (58)<br>L inferior frontal gyrus (255)                                                                                                                                                                                                                                                                                                                                      |

**Appendix 1** to Chen Z, Du M, Zhao Y, et al. Voxel-wise meta-analyses of brain blood flow and local synchrony abnormalities in medication-free patients with major depressive disorder.  
*J Psychiatry Neurosci* 2015.

DOI: 10.1503/jpn.140119

**Table S2: Regional differences between medication-free patients with MDD and controls in the subgroup meta-analyses of rCBF studies using ES-SDM (part 2 of 2)**

| Region                                                                                                                                                                                                          | Talairach coordinates |    |    | SDM z score | p value | No. voxels | Cluster breakdown (no. voxels)                                                                                                                                                                                                                                                                                                                                                                  |
|-----------------------------------------------------------------------------------------------------------------------------------------------------------------------------------------------------------------|-----------------------|----|----|-------------|---------|------------|-------------------------------------------------------------------------------------------------------------------------------------------------------------------------------------------------------------------------------------------------------------------------------------------------------------------------------------------------------------------------------------------------|
|                                                                                                                                                                                                                 | x                     | y  | z  |             |         |            |                                                                                                                                                                                                                                                                                                                                                                                                 |
| PET studies                                                                                                                                                                                                     |                       |    |    |             |         |            |                                                                                                                                                                                                                                                                                                                                                                                                 |
| MDD > control                                                                                                                                                                                                   |                       |    |    |             |         |            |                                                                                                                                                                                                                                                                                                                                                                                                 |
| Right thalamus, ventral anterior nucleus                                                                                                                                                                        | 12                    | −8 | 12 | 2.327       | < 0.001 | 652        | R thalamus, ventral anterior nucleus (126)<br>R thalamus, anterior nucleus (28)<br>R thalamus, ventral lateral nucleus (48)<br>L thalamus, pulvinar (201)<br>L thalamus, lateral posterior nucleus (92)<br>L thalamus, medial dorsal nucleus (47)<br>R lentiform nucleus, putamen (59)<br>R lentiform nucleus, lateral globus pallidus (33)<br>R lentiform nucleus, medial globus pallidus (18) |
| R caudate                                                                                                                                                                                                       | 6                     | 2  | 2  | 1.554       | < 0.001 | 161        | R caudate, caudate body (147)<br>R caudate, caudate head (14)                                                                                                                                                                                                                                                                                                                                   |
| MDD < control                                                                                                                                                                                                   |                       |    |    |             |         |            |                                                                                                                                                                                                                                                                                                                                                                                                 |
| L middle frontal gyrus                                                                                                                                                                                          | −44                   | 50 | −2 | −1.522      | < 0.001 | 448        | L middle frontal gyrus (408)<br>L inferior frontal gyrus (40)                                                                                                                                                                                                                                                                                                                                   |
| R anterior cingulate                                                                                                                                                                                            | 6                     | 26 | 16 | −1.472      | < 0.001 | 151        | Bilateral anterior cingulate (131)<br>R cingulate gyrus (20)                                                                                                                                                                                                                                                                                                                                    |
| ASL = arterial spin labelling; ES-SDM = effect-size signed differential mapping; L = left; MDD = major depressive disorder; PET = positron emission tomography; R = right; rCBF = regional cerebral blood flow. |                       |    |    |             |         |            |                                                                                                                                                                                                                                                                                                                                                                                                 |

ASL = arterial spin labelling; ES-SDM = effect-size signed differential mapping; L = left; MDD = major depressive disorder; PET = positron emission tomography; R = right; rCBF = regional cerebral blood flow.

**Table S3: Heterogeneity of rCBF and regional homogeneity changes in medication-free patients with MDD (part 1 of 2)**

| Region                                                      | Talairach coordinates |     |     | SDM z score | p value | No. voxels |
|-------------------------------------------------------------|-----------------------|-----|-----|-------------|---------|------------|
|                                                             | x                     | y   | z   |             |         |            |
| <b>Meta-analysis of rCBF studies</b>                        |                       |     |     |             |         |            |
| R thalamus, ventral anterior nucleus                        | 10                    | 8   | 12  | 4.281       | < 0.001 | 183        |
| L insula                                                    | -42                   | -26 | -2  | 3.885       | < 0.001 | 41         |
| R posterior cingulate                                       | 4                     | -46 | 12  | 3.641       | < 0.001 | 61         |
| L cingulate gyrus                                           | -2                    | -22 | 26  | 3.633       | < 0.001 | 77         |
| L middle frontal gyrus                                      | -38                   | 24  | 32  | 2.894       | 0.002   | 56         |
| <b>Meta-analysis of regional homogeneity studies</b>        |                       |     |     |             |         |            |
| L middle frontal gyrus                                      | -10                   | -10 | 66  | 5.917       | < 0.001 | 186        |
| L uncus                                                     | -20                   | 4   | -34 | 2.679       | < 0.001 | 30         |
| R superior frontal gyrus                                    | 30                    | 62  | -4  | 2.645       | < 0.001 | 63         |
| L declive                                                   | -32                   | -74 | -20 | 2.334       | 0.002   | 71         |
| L culmen                                                    | -34                   | -36 | -24 | 1.912       | 0.003   | 46         |
| R angular gyrus                                             | 52                    | -70 | 30  | 1.865       | 0.003   | 15         |
| L superior temporal gyrus                                   | -50                   | -26 | 8   | 1.828       | 0.003   | 14         |
| <b>Subgroup meta-analysis of rCBF studies excluding ASL</b> |                       |     |     |             |         |            |
| R caudate, caudate body                                     | 10                    | 8   | 12  | 4.541       | < 0.001 | 183        |
| L insula                                                    | -42                   | -26 | -2  | 4.202       | < 0.001 | 41         |
| R posterior cingulate                                       | 4                     | -46 | 12  | 3.935       | < 0.001 | 62         |
| L cingulate gyrus                                           | -2                    | -22 | 26  | 3.927       | < 0.001 | 78         |
| L middle frontal gyrus                                      | -38                   | 24  | 32  | 3.223       | 0.002   | 59         |
| L insula                                                    | -42                   | 16  | 0   | 2.745       | 0.003   | 42         |

**Appendix 1** to Chen Z, Du M, Zhao Y, et al. Voxel-wise meta-analyses of brain blood flow and local synchrony abnormalities in medication-free patients with major depressive disorder. *J Psychiatry Neurosci* 2015.

DOI: 10.1503/jpn.140119

**Table S3: Heterogeneity of rCBF and regional homogeneity changes in medication-free patients with MDD (part 2 of 2)**

| Region                                | Talairach coordinates |     |    | SDM z score | p value | No. voxels |
|---------------------------------------|-----------------------|-----|----|-------------|---------|------------|
|                                       | x                     | y   | z  |             |         |            |
| Subgroup meta-analysis of PET studies |                       |     |    |             |         |            |
| R caudate, caudate body               | 10                    | 8   | 12 | 5.295       | < 0.001 | 170        |
| L insula                              | -42                   | -26 | -2 | 5.090       | < 0.001 | 53         |
| R posterior cingulate                 | 4                     | -46 | 12 | 4.751       | < 0.001 | 63         |
| L cingulate gyrus                     | -2                    | -22 | 26 | 4.751       | < 0.001 | 83         |
| L middle frontal gyrus                | -38                   | 24  | 32 | 4.139       | 0.002   | 66         |
| R inferior frontal gyrus              | 48                    | 34  | 10 | 3.433       | 0.004   | 17         |

ASL = arterial spin labelling; L = left; MDD = major depressive disorder; PET = positron emission tomography; R = right; rCBF = regional cerebral blood flow.
